# Supplementary material for: Guided ion beam and theoretical studies of sequential bond energies of water to sodium cysteine cation
Source: Royal Society of Chemistry journal article supplement (doi:10.1039/c0cp00302f), 2010-01-01
Supplement: c0cp00302f.pdf [file c0cp00302f.pdf]

## Supporting Information for

### **Guided Ion Beam and Theoretical Studies of Sequential Bond Energies of Water to Sodium Cysteine Cation**

by Sha Joshua Ye and P. B. Armentrout\*

Table S1 provides the relative theoretical 0 K enthalpies and 298 K free energies (kJ/mol) for  $\text{Na}^+\text{Cys}(\text{H}_2\text{O})_x$  ( $x = 1 - 4$ ) optimized at the B3LYP/6-311+G(d,p) level with single point energies calculated using the 6-311+G(2d,2p) basis set and the indicated level of theory. Table S2 provides the geometrical parameters of these same complexes. Ground state species are indicated by bold face.

Figure S1 shows structures of  $\text{Na}^+\text{Cys}(\text{H}_2\text{O})_x$  ( $x = 1 - 4$ ) complexes calculated at the B3LYP/6-311+G(d,p) level of theory. Relative 0 K energies in kJ/mol from single point energy calculations including zero point energies taken from Table S1 are indicated. Hydrogen bonds in Ångstroms are shown. (H – white; C – grey; N – blue; O – red; Na – purple; S – yellow)

**Table S1.** Relative theoretical 0 K enthalpies (298 K free energies) in kJ/mol of  $\text{Na}^+\text{Cys}(\text{H}_2\text{O})_x$  <sup>a</sup>

| <i>x</i>                                                               | Structure                                                | $\Delta\Delta G^b$                 | B3LYP            | B3P86            | MP2(full)        |                  |
|------------------------------------------------------------------------|----------------------------------------------------------|------------------------------------|------------------|------------------|------------------|------------------|
| 0                                                                      | <b>[N,CO,S]-tggg<sub>+</sub></b>                         |                                    | <b>0.0 (0.0)</b> | <b>0.0 (0.0)</b> | <b>0.0 (0.0)</b> |                  |
|                                                                        | [N,CO,S]-tggg <sub>-</sub>                               |                                    | 4.6 (4.4)        | 3.4 (3.2)        | 4.1 (3.9)        |                  |
|                                                                        | [CO <sub>2</sub> <sup>-</sup> ]-ctgg <sub>+</sub>        |                                    | 11.1 (9.3)       | 7.1 (5.2)        | 11.6 (9.8)       |                  |
|                                                                        | [CO <sub>2</sub> <sup>-</sup> ]-ctgg <sub>-</sub>        |                                    | 15.0 (12.5)      | 11.2 (8.6)       | 16.8 (14.3)      |                  |
|                                                                        | [N,CO]-tcgg                                              |                                    | 15.3 (13.2)      | 14.4 (12.2)      | 16.4 (14.3)      |                  |
|                                                                        | [N,OH,S]-tggg <sub>+</sub>                               |                                    | 30.6             | 31.9             | 27.2             |                  |
|                                                                        | TS[CO <sub>2</sub> <sup>-</sup> /COOH]-ctgg <sub>+</sub> |                                    | 26.4             | 17.2             | 27.5             |                  |
|                                                                        | [COOH]-ctgg <sub>-</sub>                                 |                                    | 26.9             | 22.8             | 27.8             |                  |
|                                                                        | [COOH]-ctgg <sub>+</sub>                                 |                                    | 27.4             | 22.8             | 28.4             |                  |
|                                                                        | TS[CO <sub>2</sub> <sup>-</sup> /COOH]-ctgg <sub>-</sub> |                                    | 27.8             | 18.7             | 29.7             |                  |
|                                                                        | [CO,S]-ctgt                                              |                                    | 23.7             | 21.5             | 31.6             |                  |
|                                                                        | 1                                                        | <b>1W[N,CO,S]-tggg<sub>+</sub></b> | 4.2              | <b>0.0 (0.0)</b> | <b>0.0 (0.0)</b> | <b>0.0 (0.0)</b> |
|                                                                        |                                                          | 1W[N,CO,S]-tggg <sub>-</sub>       | 4.6              | 3.2 (3.6)        | 3.5 (3.9)        | 4.6 (5.0)        |
| 1W[CO <sub>2</sub> <sup>-</sup> ]-ctgg <sub>+</sub>                    |                                                          | 2.3                                | 8.9 (6.1)        | 4.9 (2.1)        | 11.9 (9.1)       |                  |
| 1W[N,CO]-tcgg                                                          |                                                          | 1.7                                | 10.0 (7.5)       | 9.8 (7.3)        | 13.2 (10.8)      |                  |
| 1W[N,CO]-tgtg                                                          |                                                          | 3.1                                | 13.0 (11.9)      | 12.6 (11.5)      | 17.0 (15.9)      |                  |
| 1W[bO <sup>-</sup> ]-[CO <sub>2</sub> <sup>-</sup> ]-ctgg <sub>+</sub> |                                                          | 11.9                               | 15.6 (23.4)      | 9.2 (16.9)       | 17.9 (25.6)      |                  |
| 1W[CO <sub>2</sub> <sup>-</sup> ]-ctgg <sub>-</sub>                    |                                                          | 2.1                                | 13.6 (11.5)      | 9.7 (7.6)        | 17.9 (15.8)      |                  |
| 1W[HO]-[N,CO,S]-tggg <sub>+</sub>                                      |                                                          | 10.0                               | 18.1 (23.9)      | 13.4 (19.2)      | 18.9 (24.7)      |                  |
| 1W[COOH]-ctgg <sub>+</sub>                                             |                                                          | 0.0                                | 17.7 (13.6)      | 13.7 (9.5)       | 21.8 (17.6)      |                  |
| 1W[bO <sup>-</sup> ]-[CO <sub>2</sub> <sup>-</sup> ]-cgtg              |                                                          | 10.5                               | 18.7 (25.8)      | 13.6 (20.7)      | 22.8 (29.8)      |                  |
| TS-1W[CO <sub>2</sub> <sup>-</sup> /COOH]-ctgg <sub>+</sub>            |                                                          | 1.6                                | 19.3 (16.7)      | 10.3 (7.7)       | 23.1 (20.5)      |                  |
| 1W[bCO]-[CO <sub>2</sub> <sup>-</sup> ]-ctgg <sub>+</sub>              |                                                          | 10.7                               | 21.4 (28.0)      | 15.4 (22.0)      | 23.3 (29.9)      |                  |
| 1W[bOH]-[CO]-ctgg <sub>-</sub>                                         |                                                          | 7.7                                | 22.5 (26.0)      | 17.7 (21.2)      | 25.5 (29.0)      |                  |
| 1W[bOH]-[CO]-ctgg <sub>+</sub>                                         |                                                          | 9.3                                | 22.8 (27.9)      | 17.4 (22.6)      | 26.0 (31.1)      |                  |
| 1W[HN]-[CO <sub>2</sub> <sup>-</sup> ]-ctgg <sub>+</sub>               |                                                          | 5.6                                | 29.1 (30.5)      | 21.8 (23.2)      | 28.8 (30.1)      |                  |
| 1W[bO <sup>-</sup> ]-[CO <sub>2</sub> <sup>-</sup> ]-cggg              |                                                          | 11.2                               | 40.0 (46.4)      | 35.3 (41.7)      | 44.2 (50.6)      |                  |

**Table S1.** continued

| <i>x</i> | Structure                                                            | $\Delta\Delta G^b$ | B3LYP            | B3P86            | MP2(full)        |
|----------|----------------------------------------------------------------------|--------------------|------------------|------------------|------------------|
| 2        | <b>2W[N,CO,S]-tggg+</b>                                              | 7.6                | <b>0.0 (0.0)</b> | 5.9 (3.4)        | <b>0.0 (0.0)</b> |
|          | 2W[N,CO,S]-tggg-                                                     | 8.3                | 6.0 (6.7)        | 9.9 (8.1)        | 5.3 (6.0)        |
|          | 2W[HO]-[N,CO,S]-tggg+                                                | 9.6                | 0.7 (2.7)        | 2.6 (2.1)        | 6.1 (8.0)        |
|          | <b>2W[bO<sup>-</sup>]-[CO<sub>2</sub><sup>-</sup>]-ctgg+</b>         | 11.3               | 0.0 (3.7)        | <b>0.0 (1.2)</b> | 8.3 (12.0)       |
|          | 2W[N,CO]-tcgg                                                        | 9.0                | 3.5 (4.9)        | 9.8 (8.7)        | 9.8 (11.2)       |
|          | 2W[bOH]-[CO]-ctgg+                                                   | 8.2                | 1.9 (2.4)        | 3.3 (1.4)        | 11.1 (11.7)      |
|          | <b>2W[bOH]-[CO]-ctgg-</b>                                            | 6.2                | 1.9 (0.4)        | <b>4.0 (0.0)</b> | 11.3 (9.8)       |
|          | 2W[bO <sup>-</sup> ]-[CO <sub>2</sub> <sup>-</sup> ]-cgtg            | 10.3               | 3.5 (6.2)        | 4.8 (5.0)        | 13.8 (16.4)      |
|          | 2W[bO <sup>-</sup> ]-[CO <sub>2</sub> <sup>-</sup> ]-ctgg-           | 10.6               | 4.8 (7.8)        | 5.1 (5.6)        | 14.4 (17.4)      |
|          | 2W[bCO]-[CO <sub>2</sub> <sup>-</sup> ]-ctgg+                        | 10.3               | 6.3 (9.0)        | 6.6 (6.8)        | 14.4 (17.1)      |
|          | TS-2W[bO <sup>-</sup> /bOH]-[CO <sub>2</sub> <sup>-</sup> /CO]-ctgg+ | 11.5               | 6.0 (9.9)        | 1.9 (3.4)        | 14.8 (18.7)      |
|          | 2W[HN]-[CO <sub>2</sub> <sup>-</sup> ]-ctgg+                         | 3.1                | 8.6 (4.1)        | 7.8 (0.8)        | 15.3 (10.8)      |
|          | 2W[bOH]-[CO]-cgtg                                                    | 7.6                | 5.5 (5.5)        | 7.6 (5.1)        | 15.8 (15.9)      |
|          | TS-2W[bO <sup>-</sup> /bOH]-[CO <sub>2</sub> <sup>-</sup> /CO]-ctgg- | 8.7                | 8.5 (9.6)        | 4.6 (3.2)        | 18.2 (19.3)      |
|          | 2W[bOH,bS]-[CO]-ctgt                                                 | 14.4               | 14.0 (20.9)      | 14.7 (19.1)      | 20.0 (26.8)      |
|          | 2W[HN,bO <sup>-</sup> ]-[CO <sub>2</sub> <sup>-</sup> ]-ctgg+        | 13.2               | 15.3 (20.8)      | 11.9 (14.9)      | 21.2 (26.8)      |
|          | 2W[HN]-[CO <sub>2</sub> <sup>-</sup> ]-ctgg-                         | 3.4                | 14.1 (9.9)       | 13.6 (6.9)       | 22.3 (18.1)      |
|          | 2W[bO <sup>-</sup> ]-[CO <sub>2</sub> <sup>-</sup> ]-cggg            | 9.0                | 24.0 (25.4)      | 24.9 (23.8)      | 33.6 (35.0)      |
|          | 2W[HN,bO <sup>-</sup> ]-[CO <sub>2</sub> <sup>-</sup> ]-ctgg-        | 12.0               | 19.9 (24.9)      | 16.8 (18.7)      | 26.9 (31.3)      |
|          | 2W[bO <sup>-</sup> ,bS]-[CO <sub>2</sub> <sup>-</sup> ]-cggg         | 15.9               | 31.8 (40.1)      | 30.7 (36.4)      | 35.7 (44.0)      |
|          | 2W[HN]-[COOH]-ctgg+                                                  | 0.0                | 36.7 (29.1)      | 35.3 (25.2)      | 44.4 (36.8)      |
|          | 2W[HN,bO <sup>-</sup> ]-[CO <sub>2</sub> <sup>-</sup> ]-cggg-        | 11.7               | 37.5 (41.6)      | 36.0 (37.6)      | 45.2 (49.4)      |
|          | 2W[HN,bOH]-[CO]-ctgg+                                                | 9.9                | 42.2 (44.5)      | 38.7 (38.5)      | 48.8 (51.1)      |

**Table S1.** continued

| <i>x</i> | Structure                                                                     | $\Delta\Delta G^b$ | B3LYP                     | B3P86                     | MP2(full)          |
|----------|-------------------------------------------------------------------------------|--------------------|---------------------------|---------------------------|--------------------|
| 3        | <b>3W[bOH,bS]-[CO]-ctgt</b>                                                   | 11.2               | <b>0.0</b> (9.4)          | 3.0 (9.1)                 | <b>0.0</b> (6.2)   |
|          | 3W[HO,bCO]-[N,CO,S]-tggg+                                                     | 4.0                | 4.6 (6.6)                 | 7.7 (6.4)                 | 1.2 ( <b>0.0</b> ) |
|          | <b>3W[bOH]-[CO]-ctgg+</b>                                                     | 1.2                | <b>0.6</b> ( <b>0.0</b> ) | <b>3.9</b> ( <b>0.0</b> ) | 4.4 (0.6)          |
|          | <b>3W[HN,bO<sup>-</sup>]-[CO<sub>2</sub><sup>-</sup>]-ctgg+</b>               | 5.9                | 1.6 (5.9)                 | <b>0.0</b> (1.0)          | 5.9 (7.0)          |
|          | 3W[bO <sup>-</sup> ,bW]-[CO <sub>2</sub> <sup>-</sup> ]-ctgg+                 | 11.9               | 4.9 (15.0)                | 5.4 (12.2)                | 7.2 (14.1)         |
|          | 3W[bS,bCO,bW]-[N,CO]-tggg+                                                    | 11.5               | 12.2 (21.9)               | 18.4 (24.8)               | 7.4 (13.9)         |
|          | 3W[bS,bCO,bW]-[N,CO]-tggg                                                     | 10.9               | 15.8 (25.0)               | 21.6 (27.4)               | 8.0 (13.9)         |
|          | 3W[HO,bS]-[N,CO]-tggg+                                                        | 7.8                | 7.0 (13.0)                | 9.7 (12.4)                | 8.6 (11.4)         |
|          | 3W[bOH]-[CO]-cgtg                                                             | 3.5                | 4.4 (6.1)                 | 8.7 (7.1)                 | 9.8 (8.2)          |
|          | 3W[HN,bCO]-[CO <sub>2</sub> <sup>-</sup> ]-ctgg+                              | 4.7                | 7.2 (10.1)                | 5.8 (5.4)                 | 11.0 (10.6)        |
|          | TS-3W[bOH/bO <sup>-</sup> ,bW]-[CO/CO <sub>2</sub> <sup>-</sup> ]-<br>ctgg+   | 10.4               | 9.1 (17.6)                | 5.7 (11.0)                | 11.6 (16.9)        |
|          | TS-3W[bOH/bO <sup>-</sup> ,bS/bW]-<br>[CO/CO <sub>2</sub> <sup>-</sup> ]-ctgt | 12.8               | 13.5 (24.5)               | 10.9 (18.6)               | 12.5 (20.3)        |
|          | 3W[bO <sup>-</sup> ,bW]-[CO <sub>2</sub> <sup>-</sup> ]-cgtg                  | 10.9               | 8.9 (18.0)                | 10.4 (16.2)               | 13.2 (19.1)        |
|          | 3W[bOH]-[CO]-cgtt                                                             | 0.0                | 7.9 (6.1)                 | 11.8 (6.7)                | 13.8 (8.7)         |
|          | 3W[bOH,bW]-[CO]-ctgg-                                                         | 10.8               | 10.3 (19.4)               | 10.4 (16.1)               | 13.9 (19.6)        |
|          | 3W[bO <sup>-</sup> ,bW]-[CO <sub>2</sub> <sup>-</sup> ]-ctgg-                 | 11.6               | 10.3 (20.1)               | 10.6 (17.1)               | 14.0 (20.6)        |
|          | 3W[HN,bCO]-[CO <sub>2</sub> <sup>-</sup> ]-ctgg-                              | 3.7                | 14.2 (16.1)               | 12.4 (11.0)               | 19.1 (17.7)        |
|          | TS-3W[HN,bO <sup>-</sup> /bOH]-[CO <sub>2</sub> <sup>-</sup> /CO]-<br>ctgg+   | 4.3                | 19.8 (22.3)               | 14.6 (13.8)               | 24.9 (24.2)        |
|          | 3W[HN,bOH]-[CO]-ctgg+                                                         | 1.1                | 22.4 (21.7)               | 21.8 (17.7)               | 27.8 (23.8)        |
|          | 3W[bO <sup>-</sup> ,bS]-[CO <sub>2</sub> <sup>-</sup> ]-cggg                  | 11.0               | 27.6 (36.8)               | 29.1 (34.9)               | 28.7 (34.6)        |
|          | 3W[HNf,bO <sup>-</sup> ]-[CO <sub>2</sub> <sup>-</sup> ]-cggg                 | 5.9                | 23.4 (27.5)               | 23.6 (24.4)               | 29.6 (30.4)        |
|          | 3W[HNr,bO <sup>-</sup> ]-[CO <sub>2</sub> <sup>-</sup> ]-cggg                 | 4.9                | 25.8 (28.9)               | 25.5 (25.2)               | 30.6 (30.4)        |
|          | 3W[bO <sup>-</sup> ,bW]-[CO <sub>2</sub> <sup>-</sup> ]-cggg                  | 10.5               | 28.2 (36.9)               | 30.4 (35.8)               | 32.4 (37.8)        |

**Table S1.** continued

| <i>x</i> | Structure                                                                                                                | $\Delta\Delta G^b$ | B3LYP            | B3P86            | MP2(full)        |
|----------|--------------------------------------------------------------------------------------------------------------------------|--------------------|------------------|------------------|------------------|
| 4        | <b>4W[HN,bO<sup>-</sup>,bW]-[CO<sub>2</sub><sup>-</sup>]-ctgg<sub>+</sub></b>                                            | <b>7.9</b>         | <b>0.0 (0.0)</b> | <b>0.0 (0.0)</b> | <b>0.0 (0.0)</b> |
|          | 4W[bOH,AA]-[CO]-ctgg <sub>+</sub>                                                                                        | 10.2               | 0.2 (2.5)        | 3.4 (5.7)        | 2.0 (4.3)        |
|          | 4W[HN-bW,bO <sup>-</sup> ,AD]-[CO <sub>2</sub> <sup>-</sup> ]-cgtg <sub>-</sub>                                          | 18.7               | 9.7 (20.5)       | 7.9 (18.7)       | 4.1 (15.0)       |
|          | 4W[HO,bS,bCO,bW]-[N,CO]-tggg <sub>+</sub>                                                                                | 12.3               | 11.3 (15.7)      | 15.8 (20.2)      | 4.8 (9.2)        |
|          | 4W[HN,bO <sup>-</sup> ,bW]-[CO <sub>2</sub> <sup>-</sup> ]-cgtg <sub>-</sub>                                             | 7.7                | 4.4 (4.3)        | 5.1 (4.9)        | 5.8 (5.7)        |
|          | 4W[HN-bO <sup>-</sup> <sub>r</sub> ,bO <sup>-</sup> ,bW <sub>r</sub> ]-[CO <sub>2</sub> <sup>-</sup> ]-cgtg <sub>-</sub> | 12.7               | 9.2 (14.0)       | 10.2 (15.0)      | 6.1 (10.9)       |
|          | 4W[HN-bO <sup>-</sup> <sub>f</sub> ,bO <sup>-</sup> ,bW <sub>f</sub> ]-[CO <sub>2</sub> <sup>-</sup> ]-cgtg <sub>-</sub> | 12.1               | 9.1 (13.3)       | 9.8 (13.9)       | 6.4 (10.6)       |
|          | 4W[bOH,AA]-[CO]-cgtg <sub>-</sub>                                                                                        | 9.7                | 4.3 (6.2)        | 7.4 (9.3)        | 6.8 (8.6)        |
|          | 4W[HN,bO <sup>-</sup> ,bW]-[CO <sub>2</sub> <sup>-</sup> ]-ctgg <sub>-</sub>                                             | 7.5                | 5.9 (5.6)        | 6.3 (5.9)        | 7.5 (7.1)        |
|          | 4W[bO <sup>-</sup> ,AA]-[CO <sub>2</sub> <sup>-</sup> ]-ctgg <sub>+</sub>                                                | 11.9               | 6.6 (10.6)       | 7.7 (11.7)       | 7.5 (11.5)       |
|          | 4W[bS,bCO,bHN,bW]-[N,CO]-tggg <sub>+</sub>                                                                               | 18.5               | 23.0 (33.6)      | 27.8 (38.4)      | 7.8 (18.5)       |
|          | 4W[HN-bW,bO <sup>-</sup> ,AD]-[CO <sub>2</sub> <sup>-</sup> ]-cgtg <sub>+</sub>                                          | 17.6               | 13.8 (23.5)      | 12.3 (22.0)      | 8.5 (18.2)       |
|          | 4W[HN-bS,bO <sup>-</sup> ,bW]-[CO <sub>2</sub> <sup>-</sup> ]-cgtg <sub>-</sub>                                          | 9.4                | 10.7 (12.2)      | 10.7 (12.3)      | 8.9 (10.4)       |
|          | 4W[bS,bOH,AD]-[CO]-ctgt                                                                                                  | 16.4               | 11.3 (19.8)      | 13.7 (22.1)      | 9.0 (17.4)       |
|          | 4W[HO,bS,bW]-[N,CO]-tggt                                                                                                 | 7.7                | 18.4 (18.2)      | 21.4 (21.2)      | 9.1 (8.9)        |
|          | TS-4W[bOH/bO <sup>-</sup> ,AA]-[CO/CO <sub>2</sub> <sup>-</sup> ]-ctgg <sub>+</sub>                                      | 13.0               | 8.1 (13.2)       | 5.5 (10.5)       | 9.5 (14.6)       |
|          | 4W[HN,bO <sup>-</sup> ,bW]-[CO <sub>2</sub> <sup>-</sup> ]-cgtt                                                          | 6.5                | 7.7 (6.3)        | 8.6 (7.3)        | 9.8 (8.4)        |
|          | 4W[AA-bCO]-[CO <sub>2</sub> <sup>-</sup> ]-ctgg <sub>+</sub>                                                             | 14.8               | 11.1 (18.0)      | 12.1 (18.9)      | 9.8 (16.7)       |
|          | 4W[HO-bCO,bW,AD]-[N,CO]-tggg <sub>+</sub>                                                                                | 10.7               | 15.3 (18.0)      | 18.2 (21.0)      | 10.5 (13.3)      |
|          | 4W[HN-bO <sup>-</sup> ,bO <sup>-</sup> ,bW]-[CO <sub>2</sub> <sup>-</sup> ]-cgtg <sub>+</sub>                            | 10.9               | 12.9 (15.9)      | 14.3 (17.3)      | 11.1 (14.1)      |
|          | 4W[AA-bO <sup>-</sup> ]-[CO <sub>2</sub> <sup>-</sup> ]-cgtg <sub>-</sub>                                                | 11.6               | 10.4 (14.1)      | 12.4 (16.1)      | 11.2 (14.9)      |
|          | 4W[HN-bS,bO <sup>-</sup> ,bW]-[CO <sub>2</sub> <sup>-</sup> ]-cgtt                                                       | 10.9               | 13.3 (16.3)      | 13.0 (16.0)      | 13.4 (16.4)      |
|          | 4W[bOH,AD-CO]-[CO]-ctgt                                                                                                  | 5.9                | 16.1 (14.0)      | 18.9 (16.8)      | 13.4 (11.4)      |
|          | 4W[bO <sup>-</sup> ,AA]-[CO <sub>2</sub> <sup>-</sup> ]-cgtg <sub>-</sub>                                                | 11.1               | 10.6 (13.8)      | 13.2 (16.4)      | 13.9 (17.1)      |

**Table S1.** continued

| <i>x</i> | Structure                                                                                  | $\Delta\Delta G^b$ | B3LYP       | B3P86       | MP2(full)   |
|----------|--------------------------------------------------------------------------------------------|--------------------|-------------|-------------|-------------|
|          | 4W[bOH,AA]-[CO]-cgtt                                                                       | 7.3                | 11.3 (10.7) | 13.2 (12.6) | 13.9 (17.1) |
|          | 4W[AA-bN]-[CO]-tggg                                                                        | 19.6               | 22.5 (34.2) | 23.7 (35.4) | 15.5 (27.2) |
|          | TS-4W[HN,bO <sup>-</sup> /bOH,bW]-<br>[CO <sub>2</sub> <sup>-</sup> /CO]-ctgg <sup>+</sup> | 5.5                | 16.3 (13.9) | 13.4 (11.0) | 16.9 (14.5) |
|          | 4W[HN,bOH]-[CO]-ctgg <sup>+</sup>                                                          | 0.0                | 15.8 (7.8)  | 18.8 (10.9) | 17.6 (9.7)  |
|          | 4W[bO <sup>-</sup> ,bW,AD]-[CO <sub>2</sub> <sup>-</sup> ]-cgtg <sup>-</sup>               | 18.0               | 17.0 (27.0) | 14.6 (24.6) | 17.6 (27.7) |
|          | 4W[AA-bCO]-[CO <sub>2</sub> <sup>-</sup> ]-ctgg <sup>-</sup>                               | 14.0               | 17.5 (23.6) | 17.9 (24.0) | 17.6 (23.7) |
|          | 4W[bO <sup>-</sup> ,AD-CO]-[CO <sub>2</sub> <sup>-</sup> ]-ctgt                            | 10.6               | 23.4 (26.0) | 21.6 (24.3) | 18.0 (20.7) |

<sup>a</sup> Structures optimized at the B3LYP/6-311+G(d,p) level and all single point energies are calculated using the 6-311+G(2d,2p) basis set and the indicated level of theory. Ground state species are indicated by bold face.

<sup>b</sup> Relative  $\Delta G_{298} - \Delta H_0$  (kJ/mol).

**Table S2.** Geometrical parameters of Na<sup>+</sup>Cys(H<sub>2</sub>O)<sub>x</sub> structures optimized at B3LYP/6-311+G(d,p).

| Species <sup>a</sup>                                                   | r(Na <sup>+</sup> -O=C)<br>(Å) | r(Na <sup>+</sup> -OH <sub>2</sub> )<br>(Å) | ∠Na <sup>+</sup> -O=C<br>(°) | ∠Na <sup>+</sup> -O=C-C<br>(°) | ∠N-C-C=O<br>(°) | ∠C=O-Na <sup>+</sup> -OH <sub>2</sub><br>Dihedral (°) |
|------------------------------------------------------------------------|--------------------------------|---------------------------------------------|------------------------------|--------------------------------|-----------------|-------------------------------------------------------|
| [N,CO,S]-tggg <sub>+</sub>                                             | 2.308                          |                                             | 112.2                        | -14.5                          | -25.2           |                                                       |
| [CO <sub>2</sub> <sup>-</sup> ]-ctgg <sub>+</sub>                      | 2.293, 2.324                   |                                             | 88.7, 86.8                   | -175.0, 175.0                  | -166.7, 15.1    |                                                       |
| [N,CO]-tcgg <sub>+</sub>                                               | 2.236                          |                                             | 119.6                        | 1.4                            | 12.7            |                                                       |
| [N,OH,S]-tggg <sub>+</sub> <sup>b</sup>                                | 2.386                          |                                             | 112.6                        | -24.2                          | -19.9           |                                                       |
| [COOH]-ctgg <sub>-</sub>                                               | 2.285                          |                                             | 98.1                         | 178.6                          | -171.7          |                                                       |
| [CO,S]-ctgt                                                            | 2.162                          |                                             | 129.7                        | 86.7                           | -161.3          |                                                       |
| <b>1W[N,CO,S]-tggg<sub>+</sub></b>                                     | 2.340                          | 2.279                                       | 112.8                        | -15.7                          | -23.5           | 174.0                                                 |
| 1W[N,CO,S]-tggg <sub>-</sub>                                           | 2.315                          | 2.280                                       | 113.6                        | -14.0                          | -24.7           | 175.6                                                 |
| 1W[CO <sub>2</sub> <sup>-</sup> ]-ctgg <sub>+</sub>                    | 2.320, 2.357                   | 2.270                                       | 89.0, 86.7                   | -174.8, 174.9                  | -166.5, 15.2    | 177.7                                                 |
| 1W[N,CO]-tcgg                                                          | 2.266                          | 2.270                                       | 120.0                        | 1.8                            | 13.4            | 176.4                                                 |
| 1W[N,CO]-tgtg                                                          | 2.279                          | 2.270                                       | 118.8                        | 3.3                            | -21.8           | -173.6                                                |
| 1W[bO <sup>-</sup> ]-[CO <sub>2</sub> <sup>-</sup> ]-ctgg <sub>+</sub> | 2.219                          | 2.202                                       | 124.0                        | -172.9                         | -169.3          | -4.5                                                  |
| 1W[CO <sub>2</sub> <sup>-</sup> ]-ctgg <sub>-</sub>                    | 2.315, 2.359                   | 2.272                                       | 89.1, 86.5                   | -178.3, 178.3                  | -169.0, 12.5    | -177.6, 177.0                                         |
| 1W[HO]-[N,CO,S]-tggg <sub>+</sub>                                      | 2.287                          | 5.614                                       | 112.0                        | -17.6                          | -23.0           | -114.9                                                |
| 1W[COOH]-ctgg <sub>+</sub>                                             | 2.315                          | 2.257                                       | 98.6                         | -177.0                         | -170.6          | -173.7                                                |
| 1W[bO <sup>-</sup> ]-[CO <sub>2</sub> <sup>-</sup> ]-cgtg              | 2.217                          | 2.203                                       | 124.2                        | 179.1                          | 168.3           | -1.0                                                  |
| TS-1W[CO <sub>2</sub> <sup>-</sup> /COOH]-ctgg <sub>+</sub>            | 2.326                          | 2.262                                       | 92.8                         | -176.8                         | -173.3          | 179.4                                                 |
| 1W[bCO]-[CO <sub>2</sub> <sup>-</sup> ]-ctgg <sub>+</sub>              | 2.241                          | 2.193                                       | 116.4                        | 174.2                          | 16.8            | 2.3                                                   |
| 1W[bOH]-[CO]-ctgg <sub>-</sub>                                         | 2.228                          | 2.226                                       | 133.4                        | 177.6                          | -170.7          | 2.7                                                   |
| 1W[bOH]-[CO]-ctgg <sub>+</sub>                                         | 2.232                          | 2.226                                       | 132.9                        | -173.5                         | -173.1          | -3.8                                                  |
| 1W[HN]-[CO <sub>2</sub> <sup>-</sup> ]-ctgg <sub>+</sub>               | 2.282, 2.307                   | 7.270                                       | 88.5, 86.9                   | -175.2, 175.3                  | -165.1, 16.8    | 13.0, -43.1                                           |
| 1W[bO <sup>-</sup> ]-[CO <sub>2</sub> <sup>-</sup> ]-cggg              | 2.225                          | 2.202                                       | 123.9                        | -175.1                         | -171.7          | -2.5                                                  |

**Table 2.** Continued.

| Species <sup>a</sup>                                                             | r(Na <sup>+</sup> -O=C)<br>(Å) | r(Na <sup>+</sup> -OH <sub>2</sub> )<br>(Å) | ∠Na <sup>+</sup> -O=C<br>(°) | ∠Na <sup>+</sup> -O=C-C<br>(°) | ∠N-C-C=O<br>(°) | ∠C=O-Na <sup>+</sup> -OH <sub>2</sub><br>Dihedral (°) |
|----------------------------------------------------------------------------------|--------------------------------|---------------------------------------------|------------------------------|--------------------------------|-----------------|-------------------------------------------------------|
| <b>2W[N,CO,S]-tggg<sub>+</sub></b>                                               | 2.391                          | 2.307, 2.315                                | 113.9                        | -16.3                          | -20.3           | -109.1, 140.1                                         |
| 2W[N,CO,S]-tggg <sub>-</sub>                                                     | 2.341                          | 2.302, 2.330                                | 114.9                        | -16.8                          | -19.6           | -120.1, 130.1                                         |
| 2W[HO]-[N,CO,S]-tggg <sub>+</sub>                                                | 2.319                          | 2.285, 5.649                                | 112.6                        | -18.3                          | -21.6           | 178.2, -116.1                                         |
| <b>2W[bO<sup>-</sup>]-[CO<sub>2</sub><sup>-</sup>]-ctgg<sub>+</sub></b>          | 2.253                          | 2.230, 2.285                                | 125.4                        | -173.1                         | -168.7          | -3.8, 176.8                                           |
| 2W[N,CO]-tcgg                                                                    | 2.305                          | 2.298, 2.309                                | 120.2                        | 4.8                            | 12.3            | -123.3, 105.3                                         |
| <b>2W[bOH]-[CO]-ctgg<sub>+</sub></b>                                             | 2.268                          | 2.252, 2.276                                | 134.2                        | -174.1                         | -172.3          | -3.4, 175.5                                           |
| 2W[bOH]-[CO]-ctgg <sub>-</sub>                                                   | 2.264                          | 2.252, 2.276                                | 134.6                        | 178.4                          | -170.2          | 2.4, -179.0                                           |
| 2W[bO <sup>-</sup> ]-[CO <sub>2</sub> <sup>-</sup> ]-cgtg                        | 2.250                          | 2.232, 2.286                                | 125.5                        | 179.0                          | 168.4           | -0.8, -180.0                                          |
| 2W[bO <sup>-</sup> ]-[CO <sub>2</sub> <sup>-</sup> ]-ctgg <sub>-</sub>           | 2.251                          | 2.231, 2.286                                | 125.3                        | -177.8                         | -169.2          | 0.5, -180.0                                           |
| 2W[bCO]-[CO <sub>2</sub> <sup>-</sup> ]-ctgg <sub>+</sub>                        | 2.275                          | 2.220, 2.287                                | 119.2                        | 174.7                          | 16.2            | 1.7, 178.5                                            |
| TS-2W[bO <sup>-</sup> /bOH]-[CO <sub>2</sub> <sup>-</sup> /CO]-ctgg <sub>+</sub> | 2.262                          | 2.244, 2.280                                | 129.5                        | -175.0                         | -174.7          | -4.1, 175.6                                           |
| 2W[HN]-[CO <sub>2</sub> <sup>-</sup> ]-ctgg <sub>+</sub>                         | 2.310, 2.338                   | 2.275, 7.293                                | 88.7, 87.0                   | -175.1, 175.2                  | -165.0, 16.9    | 176.1, 13.2                                           |
| 2W[bOH]-[CO]-cgtg                                                                | 2.265                          | 2.254, 2.276                                | 134.8                        | 179.5                          | 169.9           | -0.8, -180.0                                          |
| TS-2W[bO <sup>-</sup> /bOH]-[CO <sub>2</sub> <sup>-</sup> /CO]-ctgg <sub>-</sub> | 2.260                          | 2.244, 2.281                                | 129.3                        | 179.8                          | -174.1          | 0.7, 179.2                                            |
| 2W[bOH,bS]-[CO]-ctgt                                                             | 2.251                          | 2.253, 2.271                                | 144.8                        | 158.5                          | -169.8          | -135.6, 19.5                                          |
| 2W[HN,bO <sup>-</sup> ]-[CO <sub>2</sub> <sup>-</sup> ]-ctgg <sub>+</sub>        | 2.211                          | 2.200, 7.916                                | 123.4                        | -173.3                         | -168.0          | -4.1, 29.1                                            |
| 2W[HN]-[CO <sub>2</sub> <sup>-</sup> ]-ctgg <sub>-</sub>                         | 2.304, 2.343                   | 2.276, 7.242                                | 88.9, 86.6                   | -178.6, 178.6                  | -168.5, 13.2    | 178.7, 14.8                                           |
| 2W[bO <sup>-</sup> ]-[CO <sub>2</sub> <sup>-</sup> ]-cggg                        | 2.257                          | 2.231, 2.284                                | 125.6                        | -175.5                         | -172.2          | -2.7, 177.4                                           |
| 2W[HN,bO <sup>-</sup> ]-[CO <sub>2</sub> <sup>-</sup> ]-ctgg <sub>-</sub>        | 2.208                          | 2.200, 7.900                                | 123.5                        | -179.1                         | -168.9          | 0.8, 27.4                                             |
| 2W[bO <sup>-</sup> ,bS]-[CO <sub>2</sub> <sup>-</sup> ]-cggg                     | 2.252                          | 2.245, 2.267                                | 130.8                        | 166.7                          | -175.7          | 11.9, -138.6                                          |
| 2W[HN]-[COOH]-ctgg <sub>+</sub>                                                  | 2.312, 2.455                   | 2.260, 7.231                                | 97.0, 87.4                   | -177.5, 178.0                  | -171.4, 10.2    | 179.8, 21.7                                           |
| 2W[HN,bO <sup>-</sup> ]-[CO <sub>2</sub> <sup>-</sup> ]-cggg <sub>-</sub>        | 2.216                          | 2.199, 7.809                                | 123.2                        | -176.2                         | -169.9          | -2.0, 29.5                                            |
| 2W[HN,bOH]-[CO]-ctgg <sub>+</sub>                                                | 2.225                          | 2.224, 7.746                                | 131.7                        | -175.2                         | -173.3          | -2.8, 43.4                                            |



**Table 2.** Continued.

| Species <sup>a</sup>                                                                | r(Na <sup>+</sup> -O=C)<br>(Å) | r(Na <sup>+</sup> -OH <sub>2</sub> )<br>(Å) | ∠Na <sup>+</sup> -O=C<br>(°) | ∠Na <sup>+</sup> -O=C-C<br>(°) | ∠N-C-C=O<br>(°) | ∠C=O-Na <sup>+</sup> -OH <sub>2</sub><br>Dihedral (°) |
|-------------------------------------------------------------------------------------|--------------------------------|---------------------------------------------|------------------------------|--------------------------------|-----------------|-------------------------------------------------------|
| <b>3W[bOH,bS]-[CO]-ctgt</b>                                                         | 2.311                          | 2.296, 2.299, 2.300                         | 135.5                        | 146.7                          | -168.1          | 30.4, 150.1, -89.0                                    |
| <b>3W[HO,bCO]-[N,CO,S]-tggg<sub>+</sub></b>                                         | 2.477                          | 2.287, 2.314, 5.896                         | 111.2                        | -22.7                          | -17.3           | 179.2, -94.7, -104.8                                  |
| <b>3W[bOH]-[CO]-ctgg<sub>+</sub></b>                                                | 2.315                          | 2.288, 2.305, 2.306                         | 135.5                        | -176.8                         | -171.2          | 1.9, -105.7, 130.8                                    |
| <b>3W[HN,bO<sup>-</sup>]-[CO<sub>2</sub><sup>-</sup>]-ctgg<sub>+</sub></b>          | 2.243                          | 2.227, 2.288, 7.963                         | 124.9                        | -173.8                         | -167.7          | -3.2, 178.7, 29.8                                     |
| 3W[bO <sup>-</sup> ,bW]-[CO <sub>2</sub> <sup>-</sup> ]-ctgg <sub>+</sub>           | 2.282                          | 2.285, 2.299, 2.381                         | 127.0                        | -178.0                         | -168.1          | -67.4, 142.6, 2.9                                     |
| 3W[bS,bCO,bW]-[N,CO]-tggg <sub>+</sub>                                              | 2.429                          | 2.271, 2.314, 2.384                         | 119.3                        | -13.5                          | -5.7            | -69.6, 104.0, 172.9                                   |
| 3W[bS,CO,bW]-[N,CO]-tggt                                                            | 2.473                          | 2.296, 2.303, 2.379                         | 119.0                        | -10.5                          | -11.2           | -60.5, 114.1, -176.7                                  |
| 3W[HO,bS]-[N,CO]-tggg <sub>+</sub>                                                  | 2.307                          | 2.263, 2.302, 5.655                         | 119.6                        | -13.3                          | -8.0            | -71.0, 137.6, -141.1                                  |
| 3W[bOH]-[CO]-cgtg                                                                   | 2.310                          | 2.289, 2.305, 2.307                         | 136.3                        | 178.0                          | 169.3           | 3.3, -104.0, 131.6                                    |
| 3W[HN,bCO]-[CO <sub>2</sub> <sup>-</sup> ]-ctgg <sub>+</sub>                        | 2.263                          | 2.217, 2.290, 7.244                         | 119.1                        | 174.9                          | 17.4            | 1.1, -179.9, -136.5                                   |
| TS-3W[bOH/bO <sup>-</sup> ,bW]-[CO/CO <sub>2</sub> <sup>-</sup> ]-ctgg <sub>+</sub> | 2.295                          | 2.281, 2.298, 2.362                         | 130.8                        | 180.0                          | -174.1          | -71.4, 140.6, 2.9                                     |
| TS-3W[bOH/bO <sup>-</sup> ,bS/bW]-[CO/CO <sub>2</sub> <sup>-</sup> ]-ctgt           | 2.302                          | 2.284, 2.302, 2.316                         | 128.2                        | 151.6                          | -171.5          | 26.5, 148.5, -90.2                                    |
| 3W[bO <sup>-</sup> ,bW]-[CO <sub>2</sub> <sup>-</sup> ]-cgtg                        | 2.277                          | 2.282, 2.300, 2.386                         | 127.5                        | 174.2                          | 168.5           | -65.2, 143.9, 4.7                                     |
| 3W[bOH]-[CO]-cgtt                                                                   | 2.310                          | 2.290, 2.305, 2.307                         | 136.3                        | -174.1                         | 173.6           | -6.5, 102.4, -135.1                                   |
| 3W[bOH,bW]-[CO]-ctgg <sub>-</sub>                                                   | 2.279                          | 2.284, 2.300, 2.381                         | 127.0                        | 177.8                          | -169.2          | -64.2, 145.5, 5.9                                     |
| 3W[bO <sup>-</sup> ,bW]-[CO <sub>2</sub> <sup>-</sup> ]-ctgg <sub>-</sub>           | 2.278                          | 2.283, 2.300, 2.380                         | 127.2                        | -174.1                         | -168.9          | 65.0, -143.7, -5.2                                    |
| 3W[HN,bCO]-[CO <sub>2</sub> <sup>-</sup> ]-ctgg <sub>-</sub>                        | 2.263                          | 2.217, 2.290, 7.190                         | 118.2                        | 178.5                          | 12.9            | -1.4, 177.7, -133.7                                   |
| TS-3W[HN,bO <sup>-</sup> /bOH]-[CO <sub>2</sub> <sup>-</sup> /CO]-ctgg <sub>+</sub> | 2.256                          | 2.244, 2.280, 7.721                         | 130.1                        | -175.8                         | -174.7          | -3.2, 177.5, 38.6                                     |
| 3W[HN,bOH]-[CO]-ctgg <sub>+</sub>                                                   | 2.259                          | 2.250, 2.277, 7.835                         | 133.5                        | -175.1                         | -172.8          | -3.0, 178.4, 44.7                                     |
| 3W[bO <sup>-</sup> ,bS]-[CO <sub>2</sub> <sup>-</sup> ]-cggg                        | 2.296                          | 2.280, 2.302, 2.304                         | 131.0                        | 164.5                          | -179.1          | 9.5, -125.9, 124.3                                    |
| 3W[HNf,bO <sup>-</sup> ]-[CO <sub>2</sub> <sup>-</sup> ]-cggg                       | 2.247                          | 2.228, 2.287, 7.849                         | 124.9                        | -176.3                         | -170.4          | -2.4, 177.1, 31.0                                     |
| 3W[HNr,bO <sup>-</sup> ]-[CO <sub>2</sub> <sup>-</sup> ]-cggg                       | 2.246                          | 2.228, 2.287, 7.251                         | 125.1                        | -173.7                         | -170.3          | -3.8, 174.1, -46.3                                    |
| 3W[bO <sup>-</sup> ,bW]-[CO <sub>2</sub> <sup>-</sup> ]-cggg                        | 2.287                          | 2.282, 2.300, 2.369                         | 127.2                        | -171.5                         | -172.3          | -8.0, -147.3, 63.6                                    |

**Table 2.** Continued.

| Species <sup>a</sup>                                                                                                     | r(Na <sup>+</sup> -O=C)<br>(Å) | r(Na <sup>+</sup> -OH <sub>2</sub> )<br>(Å) | ∠Na <sup>+</sup> -O=C<br>(°) | ∠Na <sup>+</sup> -O=C-C<br>(°) | ∠N-C-C=O<br>(°) | ∠C=O-Na <sup>+</sup> -OH <sub>2</sub><br>Dihedral (°) |
|--------------------------------------------------------------------------------------------------------------------------|--------------------------------|---------------------------------------------|------------------------------|--------------------------------|-----------------|-------------------------------------------------------|
| 4W[HN,bO <sup>-</sup> ,bW]-[CO <sub>2</sub> <sup>-</sup> ]-ctgg <sub>+</sub>                                             | 2.269                          | 2.285, 2.301, 2.384, 8.056                  | 126.9                        | -178.4                         | -167.1          | -66.8, 2.6, 143.2, 27.2                               |
| 4W[bOH,AA]-[CO]-ctgg <sub>+</sub>                                                                                        | 2.324                          | 2.290, 2.296, 2.297, 4.085                  | 137.2                        | -174.4                         | -171.5          | -6.6, -134.6, 117.4, 171.3                            |
| 4W[HN-bW,bO <sup>-</sup> ,AD]-[CO <sub>2</sub> <sup>-</sup> ]-cgtg <sub>-</sub>                                          | 2.236                          | 2.292, 2.373, 2.548, 4.528                  | 120.0                        | -148.0                         | 149.8           | -172.3, -22.1, 44.3, 50.4                             |
| 4W[HO,bS,bCO,bW]-[N,CO]-tggg <sub>+</sub>                                                                                | 2.416                          | 2.273, 2.303, 2.425, 5.866                  | 120.0                        | -14.0                          | -6.7            | -66.6, 113.3, 177.7, -145.4                           |
| 4W[HN,bO <sup>-</sup> ,bW]-[CO <sub>2</sub> <sup>-</sup> ]-cgtg <sub>-</sub>                                             | 2.265                          | 2.288, 2.301, 2.388, 7.070                  | 127.1                        | 171.7                          | 169.5           | -62.1, 149.0, 6.8, 53.6                               |
| 4W[HN-bO <sup>-</sup> <sub>r</sub> ,bO <sup>-</sup> ,bW <sub>r</sub> ]-[CO <sub>2</sub> <sup>-</sup> ]-cgtg <sub>-</sub> | 2.267                          | 2.284, 2.301, 2.387, 5.913                  | 129.0                        | -179.1                         | 174.5           | -61.4, 146.5, 6.6, -28.0                              |
| 4W[HN-bO <sup>-</sup> <sub>f</sub> ,bO <sup>-</sup> ,bW <sub>f</sub> ]-[CO <sub>2</sub> <sup>-</sup> ]-cgtg <sub>-</sub> | 2.266                          | 2.284, 2.301, 2.391, 5.845                  | 128.7                        | -177.8                         | -177.2          | 59.8, -147.9, -8.1, 31.7                              |
| 4W[bOH,AA]-[CO]-cgtg <sub>-</sub>                                                                                        | 2.323                          | 2.291, 2.296, 2.296, 4.084                  | 138.0                        | 179.5                          | 168.7           | -1.5, 124.0, -128.2, 177.8                            |
| 4W[HN,bO <sup>-</sup> ,bW]-[CO <sub>2</sub> <sup>-</sup> ]-ctgg <sub>-</sub>                                             | 2.267                          | 2.286, 2.300, 2.387, 8.024                  | 126.9                        | 177.4                          | -168.5          | -62.4, 147.3, 6.5, 27.0                               |
| 4W[bO <sup>-</sup> ,AA]-[CO <sub>2</sub> <sup>-</sup> ]-ctgg <sub>+</sub>                                                | 2.305                          | 2.272, 2.308, 2.313, 4.125                  | 128.6                        | -173.9                         | -167.7          | -2.5, 126.1, -125.8, 179.4                            |
| 4W[bS,bCO,bHN,bW]-[N,CO]-tggg <sub>+</sub>                                                                               | 2.627                          | 2.307, 2.380, 2.421, 2.449                  | 117.8                        | -16.3                          | -0.1            | -58.8, -79.2, 94.8, 164.4                             |
| 4W[HN-bW,bO <sup>-</sup> ,AD]-[CO <sub>2</sub> <sup>-</sup> ]-cgtg <sub>+</sub>                                          | 2.236                          | 2.292, 2.375, 2.544, 4.530                  | 120.3                        | -147.1                         | 150.3           | -172.7, -22.6, 43.8, 50.0                             |
| 4W[HN-bS,bO <sup>-</sup> ,bW]-[CO <sub>2</sub> <sup>-</sup> ]-cgtg <sub>-</sub>                                          | 2.269                          | 2.285, 2.301, 2.386, 7.498                  | 127.0                        | -172.2                         | -174.9          | 62.3, -148.1, -7.1, -45.3                             |
| 4W[bS,bOH,AD]-[CO]-ctgt                                                                                                  | 2.314                          | 2.237, 2.298, 2.442, 3.521                  | 137.2                        | 146.8                          | -168.8          | 130.8, -83.8, 31.4, 83.5                              |
| 4W[HO,bS,bW]-[N,CO]-tggt                                                                                                 | 2.363                          | 2.297, 2.344, 2.454, 5.714                  | 120.3                        | -15.0                          | -10.2           | -131.8, 112.0, -46.8, -142.9                          |
| TS-4W[bOH/bO <sup>-</sup> ,AA]-[CO/CO <sub>2</sub> <sup>-</sup> ]-ctgg <sub>+</sub>                                      | 2.315                          | 2.282, 2.303, 2.304, 4.105                  | 131.9                        | -175.3                         | -174.0          | -4.1, 121.3, -131.0, 175.2                            |
| 4W[HN,bO <sup>-</sup> ,bW]-[CO <sub>2</sub> <sup>-</sup> ]-cgtt                                                          | 2.265                          | 2.287, 2.301, 2.389, 7.164                  | 127.4                        | 173.6                          | 171.0           | -62.8, 148.0, 5.9, 52.9                               |
| 4W[AA-bCO]-[CO <sub>2</sub> <sup>-</sup> ]-ctgg <sub>+</sub>                                                             | 2.307                          | 2.295, 2.296, 2.319, 3.431                  | 127.0                        | 176.5                          | 13.6            | 48.1, 49.7, -173.6, 0.3                               |
| 4W[HO-bCO,bW,AD]-[N,CO]-tggg <sub>+</sub>                                                                                | 2.334                          | 2.258, 2.304, 4.212, 4.819                  | 116.0                        | 22.2                           | 6.2             | 95.9, -137.9, 93.0, 125.7                             |
| 4W[HN-bO <sup>-</sup> ,bO <sup>-</sup> ,bW]-[CO <sub>2</sub> <sup>-</sup> ]-cgtg <sub>+</sub>                            | 2.265                          | 2.283, 2.301, 2.394, 5.833                  | 128.9                        | -176.8                         | -177.8          | 58.8, -149.6, -8.9, 32.0                              |
| 4W[AA-bO <sup>-</sup> ]-[CO <sub>2</sub> <sup>-</sup> ]-cgtg <sub>-</sub>                                                | 2.279                          | 2.292, 2.295, 2.314, 3.460                  | 137.3                        | 179.9                          | 167.6           | -49.9, 45.2, 177.6, -2.2                              |
| 4W[HN-bS,bO <sup>-</sup> ,bW]-[CO <sub>2</sub> <sup>-</sup> ]-cgtt                                                       | 2.271                          | 2.287, 2.300, 2.387, 7.683                  | 126.7                        | -171.2                         | -177.8          | 60.2, -150.3, -9.2, -41.5                             |
| 4W[bOH,AD-CO]-[CO]-ctgt                                                                                                  | 2.423                          | 2.249, 2.284, 2.302, 3.689                  | 131.7                        | -164.6                         | -167.1          | -151.2, -14.9, 94.4, -153.8                           |

**Table 2.** Continued.

| Species <sup>a</sup>                                                                        | r(Na <sup>+</sup> -O=C)<br>(Å) | r(Na <sup>+</sup> -OH <sub>2</sub> )<br>(Å) | ∠Na <sup>+</sup> -O=C<br>(°) | ∠Na <sup>+</sup> -O=C-C<br>(°) | ∠N-C-C=O<br>(°) | ∠C=O-Na <sup>+</sup> -OH <sub>2</sub><br>Dihedral (°) |
|---------------------------------------------------------------------------------------------|--------------------------------|---------------------------------------------|------------------------------|--------------------------------|-----------------|-------------------------------------------------------|
| 4W[bO <sup>-</sup> ,AA]-[CO <sub>2</sub> <sup>-</sup> ]-cgtg <sub>-</sub>                   | 2.303                          | 2.273, 2.309, 2.312, 4.126                  | 128.7                        | 179.3                          | 168.6           | -2.1, 122.5, -129.0, 176.4                            |
| 4W[bOH,AA]-[CO]-cgtt                                                                        | 2.321                          | 2.292, 2.296, 2.296, 4.085                  | 138.1                        | -176.8                         | 173.0           | -3.8, -130.7, 121.3, 174.8                            |
| 4W[AA-bN]-[CO]-tggg                                                                         | 2.302                          | 2.271, 2.293, 2.414, 3.720                  | 134.3                        | -126.9                         | 113.7           | 71.4, -143.5, -16.5, 33.0                             |
| TS-4W[HN,bO <sup>-</sup> /bOH, bW]-[CO <sub>2</sub> <sup>-</sup> /CO]-<br>ctgg <sub>+</sub> | 2.288                          | 2.282, 2.297, 2.367, 7.834                  | 131.5                        | 178.7                          | -174.2          | -70.0, 142.5, 3.8, 37.6                               |
| 4W[HN,bOH]-[CO]-ctgg <sub>+</sub>                                                           | 2.305                          | 2.285, 2.306, 2.307, 7.960                  | 134.9                        | -178.0                         | -172.0          | 1.8, -106.5, 131.5, 45.2                              |
| 4W[bO <sup>-</sup> ,bW,AD]-[CO <sub>2</sub> <sup>-</sup> ]-cgtg <sub>-</sub>                | 2.276                          | 2.276, 2.353, 2.402, 3.547                  | 127.8                        | -174.5                         | -169.6          | -140.9, 99.6, -3.2, 45.3                              |
| 4W[AA-bCO]-[CO <sub>2</sub> <sup>-</sup> ]-ctgg <sub>-</sub>                                | 2.309                          | 2.288, 2.296, 2.319, 3.431                  | 126.2                        | 178.0                          | 12.0            | 49.2, -48.6, -173.3, 0.0                              |
| 4W[bO <sup>-</sup> ,AD-CO]-[CO <sub>2</sub> <sup>-</sup> ]-ctgt                             | 2.391                          | 2.262, 2.279, 2.305, 3.653                  | 125.1                        | -162.6                         | -166.7          | -160.2, -15.8, 82.3, -157.3                           |

<sup>a</sup> Names and numbers in bold indicate the lowest energy structures for complexes.

<sup>b</sup> All geometric parameters refer to Na-O(H) instead of Na-OC.

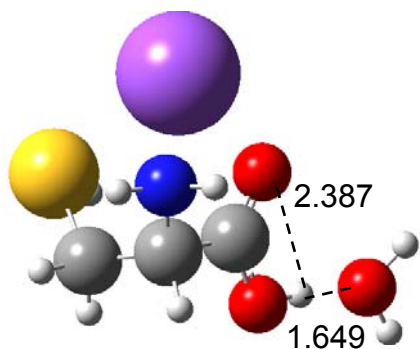

1W[HO]-[N,CO,S]-tggg+, 13-19

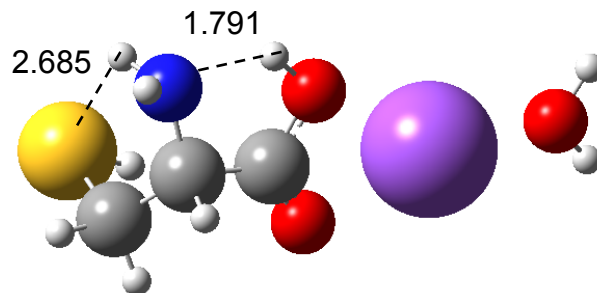

1W[COOH]-ctgg+, 14-22

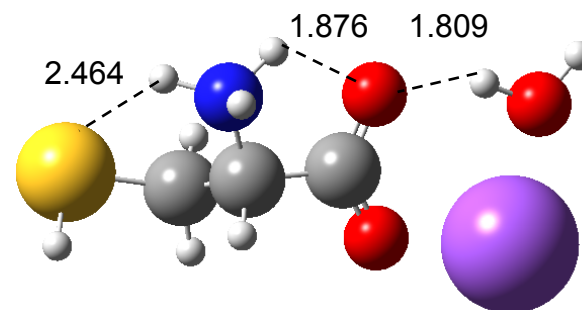

1W[bO<sup>-</sup>]-[CO<sub>2</sub><sup>-</sup>]-cgtg, 14-23

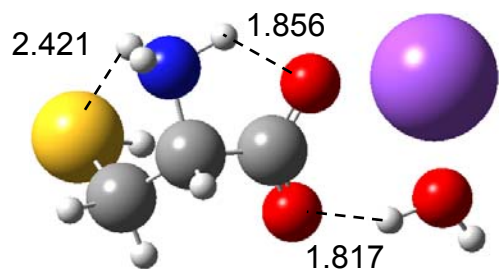

1W[bCO]-[CO<sub>2</sub><sup>-</sup>]-ctgg+, 15-23

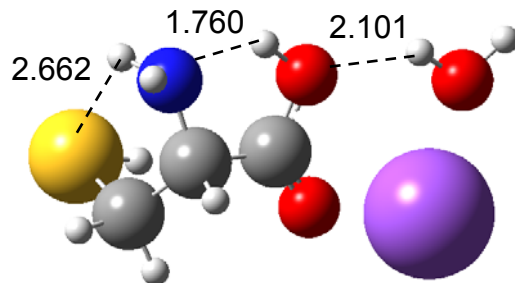

1W[bOH]-[CO]-ctgg+, 17-26

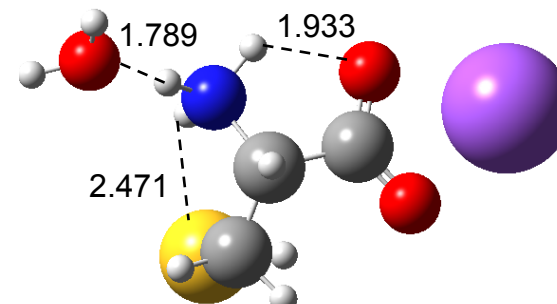

1W[HN]-[CO<sub>2</sub><sup>-</sup>]-ctgg+, 22-29

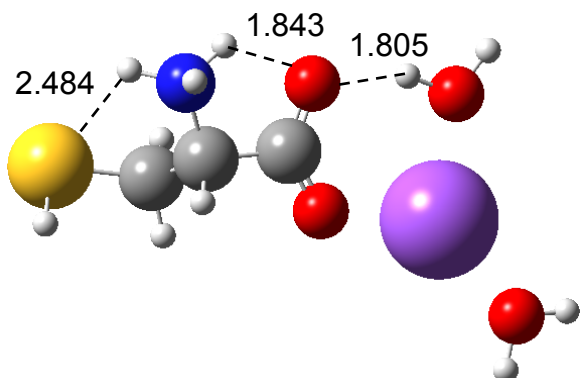

2W[bO<sup>-</sup>]-[CO<sub>2</sub><sup>-</sup>]-cgtg, 3-14

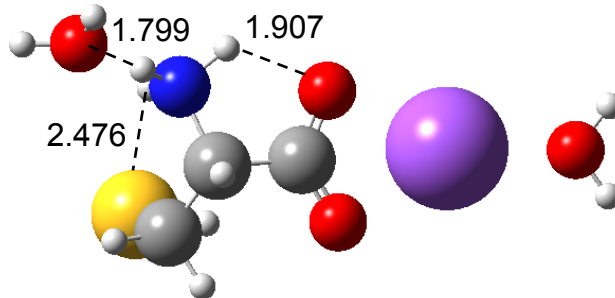

2W[HN]-[CO<sub>2</sub><sup>-</sup>]-ctgg+, 8-15

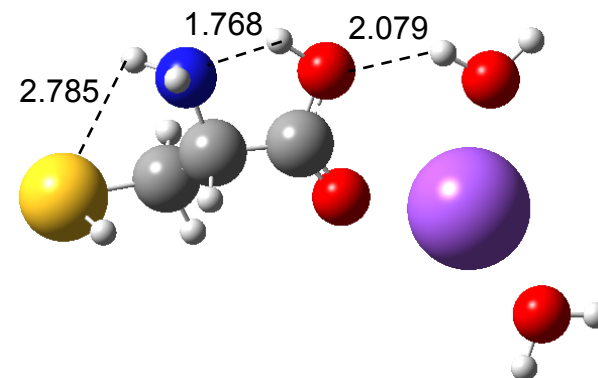

2W[bOH]-[CO]-cgtg, 5-16

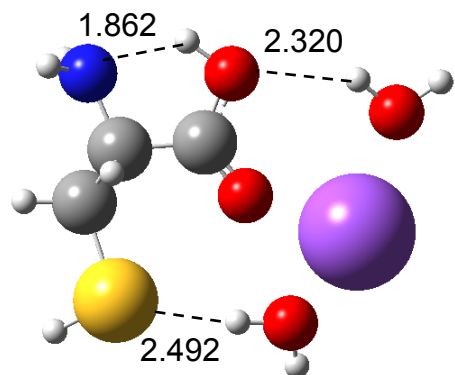

2W[bOH,bS]-[CO]-ctgt, 14-20

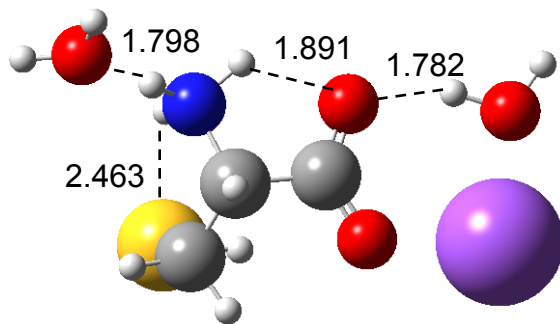

2W[HN,bO<sup>-</sup>]-[CO<sub>2</sub><sup>-</sup>]-ctgg+, 12-21

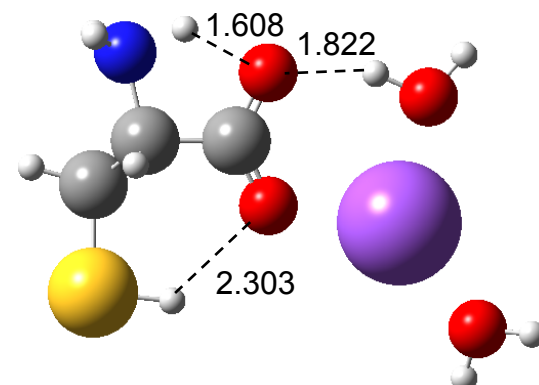

2W[bO<sup>-</sup>]-[CO<sub>2</sub><sup>-</sup>]-cggg, 24-34

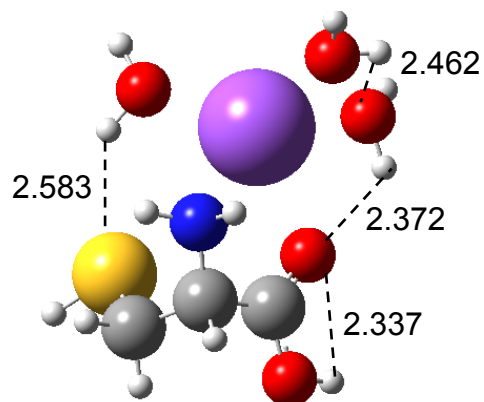

3W[bS,bCO,bW]-[N,CO]-tggt, 8-22

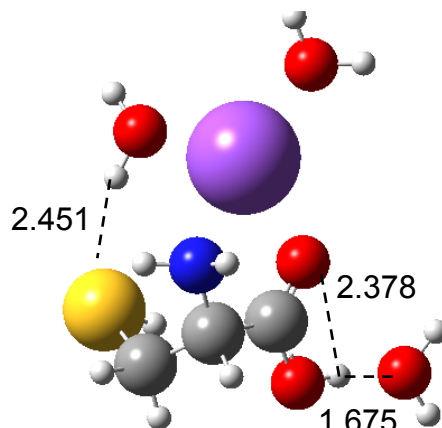

3W[HO,bS]-[N,CO]-tggg+, 7-10

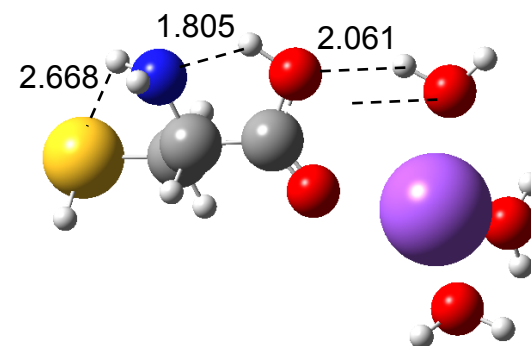

3W[bOH]-[CO]-cgtg, 4-10

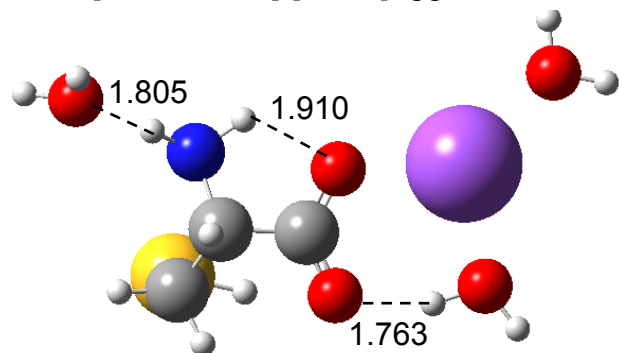

3W[HN,bCO]-[CO<sub>2</sub><sup>-</sup>]-ctgg+, 6-11

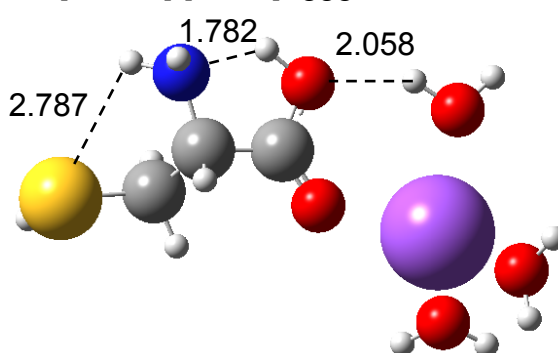

3W[bOH]-[CO]-cgtt, 8-14

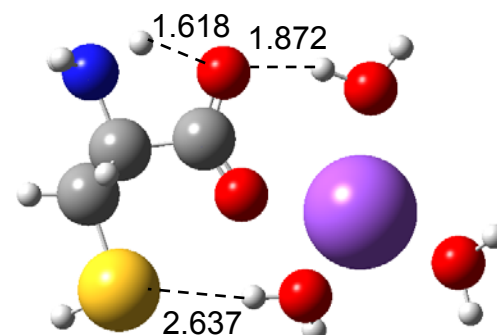

3W[bO<sup>-</sup>,bS]-[CO<sub>2</sub><sup>-</sup>]-cggg, 28-29

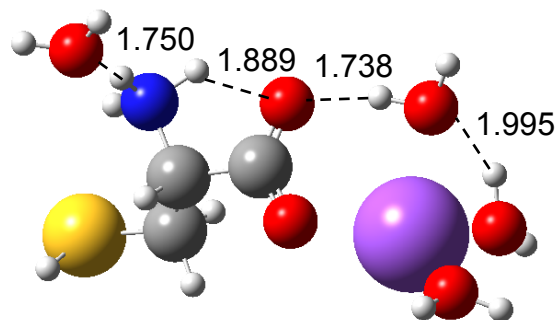

4W[HN,bO<sup>-</sup>,bW]-[CO<sub>2</sub><sup>-</sup>]-cgtg<sup>-</sup>, 4-6

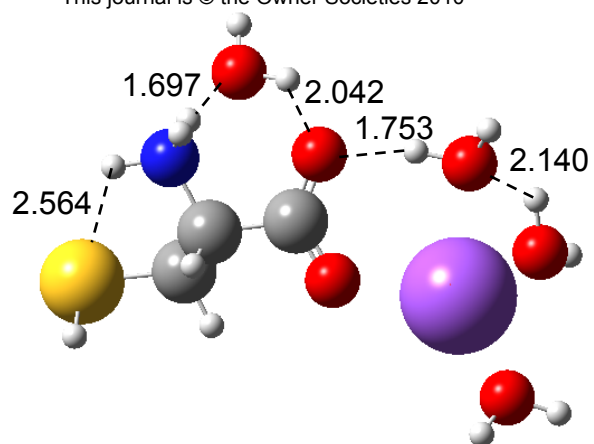

4W[HN-bO<sup>-</sup>r,bO<sup>-</sup>,bWr]-[CO<sub>2</sub><sup>-</sup>]-cgtg<sup>-</sup>, 6-10

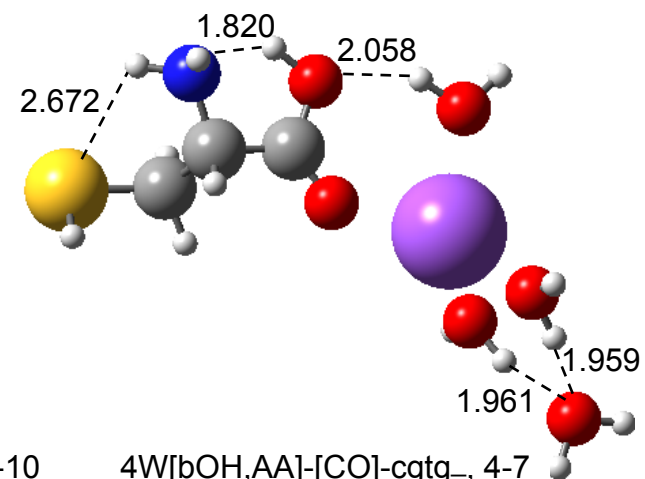

4W[bOH,AA]-[CO]-cgtg<sup>-</sup>, 4-7

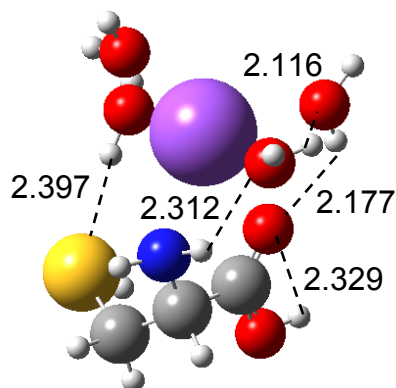

4W[bS,bCO,bHN,bW]-[N,CO]-tggg<sup>+</sup>, 8-28

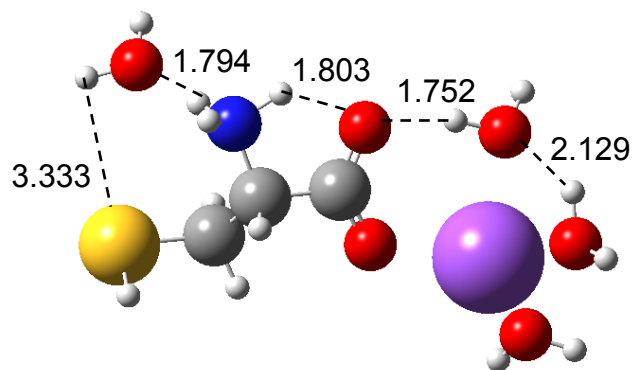

4W[HN-bS,bO<sup>-</sup>,bW]-[CO<sub>2</sub><sup>-</sup>]-cgtg<sup>-</sup>, 9-11

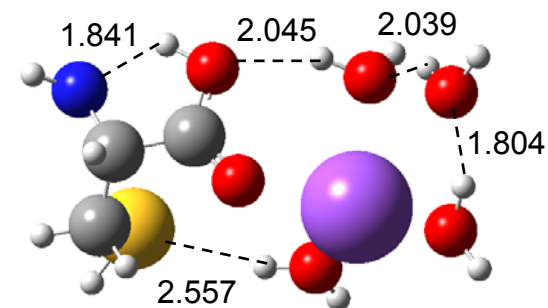

4W[bS,bOH,AD]-[CO]-ctgt, 9-14

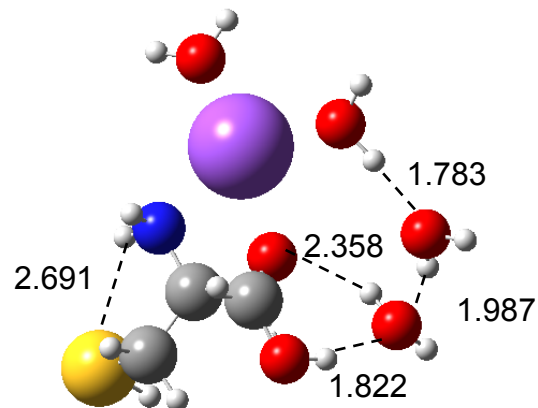

4W[HO-bCO,bW,AD]-[N,CO]-tggg<sup>+</sup>, 10-18

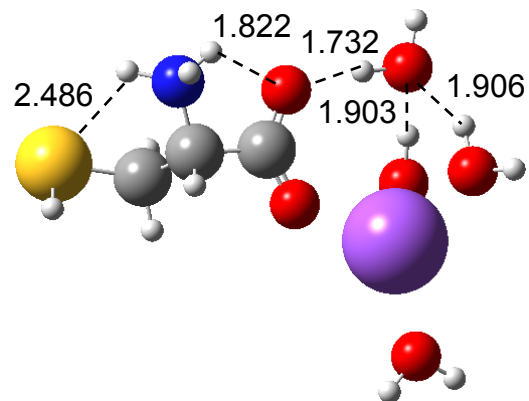

4W[AA-bO<sup>-</sup>]-[CO<sub>2</sub><sup>-</sup>]-cgtg<sup>-</sup>, 10-12

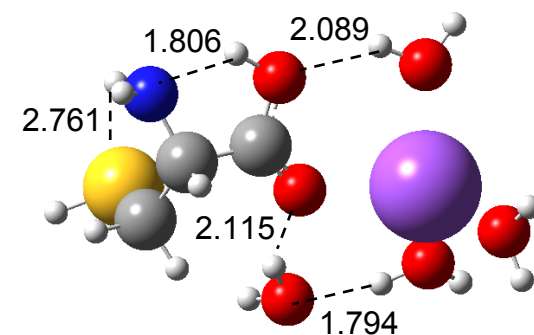

4W[bOH,AD-CO]-[CO]-ctgt, 13-19
